# Supplementary material
Source: publisher site journal article supplement (https://www.dovepress.com/article/225910)
Supplement: Supplementary file 1 [file get_supplementary_file.php]

**Supplementary file 1:**

**File name:** Additional file 1- questionnaire

| **English version questionnaire**  Date ____/____/_____  Code ________  **Part I: Socio-demographic and clinical related Questions** | | |
| --- | --- | --- |
| 101 | Age | _____Years |
| 102 | Sex | 1. 1.Male 2. Female |
| 103 | Educational status? | 1. 1.Can’t read and write 2. 2.can read and write 3. 3.Primary school 4. 4. Secondary school 5. 5.preparatory and above |
| 104 | Marital status? | 1. 1. Single 2. 2. Married 3. 3. Divorced 4. 4. Widowed |
| 105 | Residence? | 1. 1. Rural 2. Urban |
| 106 | Occupation? | 1. 1.Farmer 2. 2.House wife 3. 3.Merchant 4. 4.Government employee 5. 5.self employed 6. 5. Others specify… |
| 107 | Income | -----------------ETB per month |
| 108 | Have you heard Information about lifestyle modification to control blood pressure? | 1. 1.Yes 2. No |
| 109 | If yes for Q109 from where you heard? | 1. 1.Family 2. 2.Friends 3. 3.Neighbors 4. 4.Health professional 5. 5.Mass media |
| 110 | Family Hx of hypertension | 1. 1.Yes 2. No |
| 111 | Duration of follow up | ------------years |
| 112 | Presence of co-morbidity | 1. 1.Yes 2.No |
| 113 | If yes for Q113 which of the following co-morbidities | 1. 1.Diabetes 2. 2.Chronic kidney disease 3. 3.Heart problem 4. 4. Others specified………. |

| **Part II : Knowledge questions about high blood pressure, risk factors, and sign and symptoms** |
| --- |

| S.no | Questions | Response |
| --- | --- | --- |
| 201 | What does it meant by blood pressure raise?(check only one) | 1. 1.BP≥140/90mmHg 2. 2.BP<120/80mmHg 3. 3.BP=90/50mmHg 4. 4.I don’t know |
| 202 | Which is the risk factor for raised blood pressure? (check all that apply) | 1. 1.Stress 2. 2.Age 3. 3.Hereditary 4. 4.Smoking 5. 5.Alcoholism 6. 6.Don’t know |
| 203 | Which are the signs and symptoms of raised blood pressure? (check all that apply) | 1. 1.Head ache 2. 2.Dizziness 3. 3.Blurring of vision 4. 4.Fatigue 5. 5.I don’t know |
| 204 | High blood pressure can be controlled? | 1. 1.Yes 2.No |
| 205 | Do people with high blood pressure feel anything different? | 1. 1.Yes 2.No |
| 206 | High blood pressure/ hypertension is a lifelong disease? | 1. 1.Yes 2.No |
| 207 | High blood pressure can cause heart, brain and kidney problem? | 1. 1.Yes 2.No |
| 208 | High blood pressure can be treated without use of medication? | 1. 1.Yes 2.No |

|  |
| --- |

**Part III: Knowledge questions *about blood pressure control***

|  |  |  |
| --- | --- | --- |
| S.No | Questions | Response |
| 301 | Which of the following methods are used to control blood pressure? | a) Diet control b) Drug therapy c) Regular exercise d) Diet, drug & regular exercise e) Don't know |
| 302 | What is the nutritional therapy of hypertension? | a) Water restriction b) Decrease salt intake c) Increase salt intake d) Decrease calorie reach foods e) Don't know |
| 303 | Which of the following food should a hypertensive patient avoid? | a) Salt reach and salty foods b) Spicy foods c) Fatty foods  d) Vegetables e) Don't know |
| 304 | How much salt is given to hypertensive patient/day? | ------gm |
| 305 | What form of exercise is good for blood pressure control? | a) Aerobics (walking, jogging) b) Weight bearing c) Driving d) Dancing e) Don't know |
| 306 | At what time hypertensive medications should be taken? | a) Under stress situation. b) As life long way to manage high blood pressure. c) When activities require physical exertion. d) Whenever a patent feels bad. e) Don't know |
| 307 | How does hypertensive patient take medications? | a) As per information got from other hypertensive patents. b) As per information got from books and journals. c) Taking medications which were prescribed for the disease long time ago. d) Taking the medications which are currently prescribed by the doctor. |
| 308 | How often should a hypertensive patient rest? | a) Complete bed rest. b) Rest after doing all the work. c) Rest in between activities. d) No need to exercise. e) Don't know |
